# Supplementary material
Source: publisher site journal article supplement (https://www.dovepress.com/article/404039)
Supplement: Supplementary file 1 [file get_supplementary_file.php]

Supplementary Table 1. ICD-9 and ICD-10 codes for the listed comorbidities.

| Comorbidities | ICD-9 | ICD-10 |
| --- | --- | --- |
| Acute respiratory failure | 518.81, 518.83, 518.84 | J96.00, J96.90, J96.91 |
| Pneumonia | 480-487.8, 770.0X, 997.31 | J82, J69.0, P24.01, J69, J13-18 |
| Lung cancer | 162 | C46, C78.0, D02.20, C34, C7A.0 |
| Thoracic malignancies | 160-165 | C76.1 |
| Bronchiectasis | 494 | J47 |
| Hypertensive diseases | 401-406 | I10-I16 |
| Ischemic heart disease | 410-414 | I20-I25 |
| Heart failure | 428 | I50 |
| Stroke | 430-434 | I63.9 |
| Myocardial infarction | 410, 412 | I21, I22, I25.2 |
| Cancer (except lung and thoracic) | 140-208 without 160-165, 196-199 | C00-C26, C30-C33, C37-C41, C43-C45, C47-C76, C81-C85, C88, C90-C97 without C46, C78.0, D02.20, C34, C7A.0, C76.1 |
| Diabetes mellitus | 250 | E08-E13 |
| Renal diseases | 584, 585, 586 | N17, N18 |
| Dementia/Alzheimer's disease | 290, 331.0 | F00, F01, F02, F05.1, G30, G31.1 |
